# Supplementary material for: Polypyrrole confined in dendrimer-like silica nanoparticles for combined photothermal and chemotherapy of cancer
Source: Royal Society of Chemistry journal article supplement (doi:10.1039/c6ra03314h), 2016-01-01
Supplement: c6ra03314h1.pdf [file c6ra03314h1.pdf]

## Supporting Information

### **Polypyrrole confined in dendrimer-like silica nanoparticles for combined photothermal and chemotherapy of cancer**

Ruokun Chen <sup>a,\*</sup>, Fengdong Yang <sup>a</sup>, Yake Xue <sup>a</sup>, Xinting Wei <sup>a</sup>, Lijun Song <sup>a</sup> and Xianzhi Liu <sup>a</sup>

<sup>a</sup> Department of Neurosurgery, The First Affiliated Hospital of Zhengzhou University, Zhengzhou  
450052, Henan, China

\*Corresponding author:

Ruokun Chen, Department of Neurosurgery, The First Affiliated Hospital of Zhengzhou  
University, Zhengzhou 450052, Henan, China. Tel: +86 0371 67967082. E-mail:  
ruokunchen@163.com (R.K. Chen)

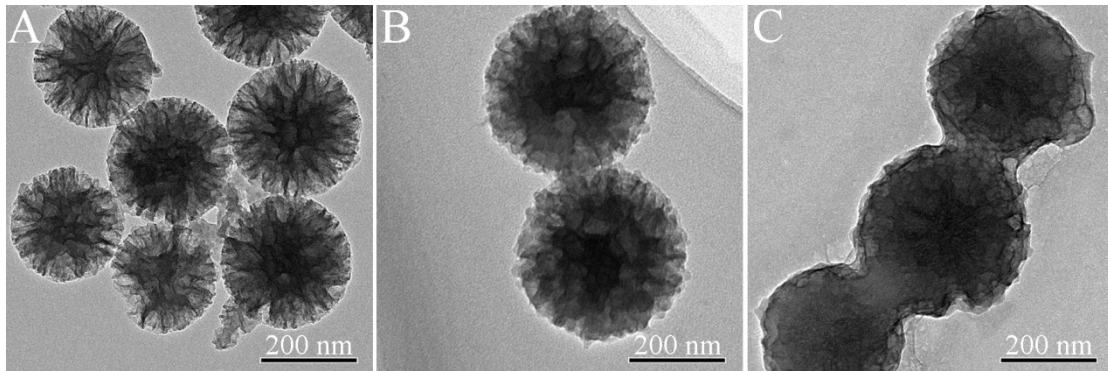

Fig. S1 TEM images of PPy@DSNs-NH<sub>2</sub> prepared with different volume of pyrrole monomer, (A) 692, (B) 1384 and (C) 4152  $\mu$ L.

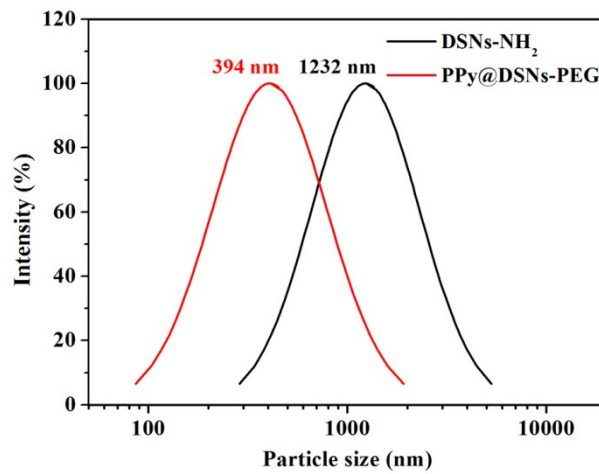

Fig. S2 Size distribution curves of DSNs-NH<sub>2</sub> and PPy@DSNs-PEG in cell culture medium.

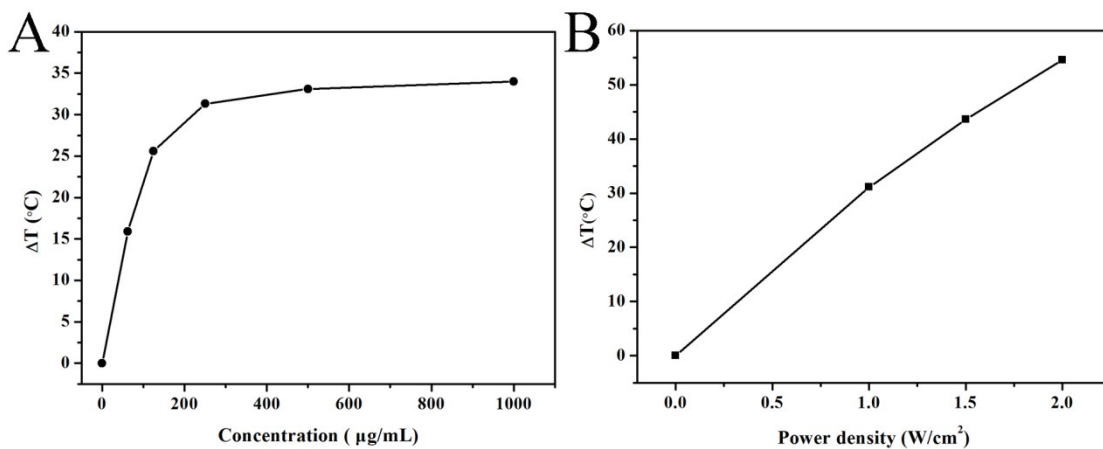

Fig. S3 Temperature changes ( $\Delta T$ ) over a period of 10 min NIR irradiation under (A) different particle concentrations and (B) different power densities.
